# Supplementary material
Source: publisher site journal article supplement (http://kjim.org/upload/media/kjim-2020-452-suppl1.pdf)
Supplement: Supplementary file 1 [file kjim-2020-452-suppl1.pdf]

**Supplementary Table 1. Comparison of gastroenterologists and surgeons in the management of pancreatic cystic neoplasms**

| Variable                                                                                | Gastroenterologist<br>(n = 110) | Surgeon<br>(n = 5) | p value |
|-----------------------------------------------------------------------------------------|---------------------------------|--------------------|---------|
| Sex, male/female                                                                        | 106/4                           | 5/0                | 0.547   |
| Age, yr                                                                                 |                                 |                    | 0.201   |
| 31–40                                                                                   | 32 (29.1)                       | 1 (20)             |         |
| 41–50                                                                                   | 44 (40.0)                       | 4 (80)             |         |
| 51–60                                                                                   | 29 (26.4)                       | 0                  |         |
| 60 or more                                                                              | 5 (4.5)                         | 0                  |         |
| Type of hospital                                                                        |                                 |                    | 0.067   |
| PS                                                                                      | 32 (29.1)                       | 0                  |         |
| TA                                                                                      | 78 (70.9)                       | 5 (100)            |         |
| Preferred guidelines                                                                    |                                 |                    | 0.111   |
| 2012/2017 IAP                                                                           | 70 (63.6)                       | 5 (100)            |         |
| 2018 ACG                                                                                | 22 (20.0)                       | 0                  |         |
| 2018 European                                                                           | 18 (16.4)                       | 0                  |         |
| Preferred initial imaging modalities                                                    |                                 |                    | 0.747   |
| Enhanced CT                                                                             | 24 (21.8)                       | 2 (40)             |         |
| GE-MRI/MRCP                                                                             | 45 (40.9)                       | 2 (40)             |         |
| MRI/MRCP                                                                                | 14 (12.7)                       | 0                  |         |
| EUS                                                                                     | 26 (23.6)                       | 1 (20)             |         |
| ERCP                                                                                    | 1 (0.9)                         | 0                  |         |
| Preferred follow-up imaging modalities                                                  |                                 |                    | 0.200   |
| Enhanced CT                                                                             | 62 (56.4)                       | 5 (100)            |         |
| GE-MRI/MRCP                                                                             | 12 (10.9)                       | 0                  |         |
| MRI/MRCP                                                                                | 19 (17.3)                       | 0                  |         |
| EUS                                                                                     | 11 (10.0)                       | 0                  |         |
| US                                                                                      | 6 (17.3)                        | 0                  |         |
| What time interval would you choose for surveillance in 2–3 cm PCNs                     |                                 |                    | 0.790   |
| Every 3 months                                                                          | 32 (30.1)                       | 2 (40)             |         |
| Every 6 months                                                                          | 79 (66.4)                       | 3 (60)             |         |
| Every year                                                                              | 5 (4.5)                         | 0                  |         |
| What time interval would you choose for surveillance in PCNs with MPD dilation (5–9 mm) |                                 |                    | 0.480   |
| Every 3 months                                                                          | 10 (9.1)                        | 0                  |         |
| Every 6 months                                                                          | 77 (79.1)                       | 5 (100)            |         |
| Every years                                                                             | 13 (11.8)                       | 0                  |         |
| Do you follow-up PCNs for more than 5 years                                             |                                 |                    | 0.547   |
| Yes                                                                                     | 106 (96.4)                      | 5 (100)            |         |
| No                                                                                      | 4 (3.6)                         | 0                  |         |
| When would you usually recommend surgery                                                |                                 |                    | 0.801   |
| High-risk stigmata <sup>a</sup>                                                         | 90 (91.8)                       | 4 (80)             |         |
| Worrisome features <sup>b</sup>                                                         | 20 (18.2)                       | 1 (20)             |         |

Values are presented as number (%).

PS, primary/secondary; TA, tertiary/academic; IAP, International Association of Pancreatology; ACG, American College Gastroenterology; CT, computed tomography; GE-MRI, gadolinium-enhanced magnetic resonance imaging; MRCP, magnetic resonance cholangiopancreatography; EUS, endoscopic ultrasound; ERCP, endoscopic retrograde choangiopancreatography; US, ultrasound; PCN, pancreas cystic neoplasm; MPD, main pancreatic duct.

<sup>a</sup>High-risk stigmata including obstructive jaundice due to cyst, enhancing mural nodule ( $\geq 5$  mm), MPD dilation ( $\geq 10$  mm) [6].

<sup>b</sup>Worrisome features including cyst ( $\geq 3$  cm), enhancing mural nodule ( $\leq 5$  mm), MPD dilation (5–6 mm), cyst growth rate  $\geq 5$  mm/2 years, thickened/enhancing cyst walls, abrupt change in pancreatic duct diameter with distal pancreatic atrophy, lymphadenopathy, increased serum level of CA 19-9 [6].
